# Supplementary material for: Activation of carbon dioxide by new mixed sandwich uranium(iii) complexes incorporating cyclooctatetraenyl and pyrrolide, phospholide, or arsolide ligands
Source: Royal Society of Chemistry journal article supplement (doi:10.1039/c5nj00590f), 2015-01-01
Supplement: c5nj00590f1.pdf [file c5nj00590f1.pdf]

***New Journal of Chemistry***

Activation of Carbon Dioxide by New Mixed Sandwich Uranium(III) Complexes  
Incorporating Cyclooctatetraenyl and Pyrrolide, Phospholide, or Arsolide Ligands

Rachel J. Kahan,<sup>a</sup> F. Geoffrey N. Cloke,<sup>a\*</sup> S. Mark Roe<sup>a</sup> and François Nief<sup>b</sup>

<sup>a</sup>Department of Chemistry, School of Life Sciences, University of Sussex, Brighton, BN1  
9QJ, UK; <sup>b</sup> École Polytechnique, CNRS, Route de Saclay, F-91128 Palaiseau, France.

**Electronic Supplementary Information**

### Cyclic voltammetry

Studies were conducted in an MBraun glovebox under argon using a BASi Epsilon-EC potentiostat under computer control.  $iR$  drop was compensated for by using the feedback method. All experiments were conducted using a gold disc (2.0 mm<sup>2</sup>) or glassy carbon disc (7.0 mm<sup>2</sup>) working electrode, platinum wire counter electrode and silver wire pseudo-reference electrode. Ferrocene (*ca.* 1 mg) was added to all solutions after initial voltammograms had been obtained to obtain the [FeCp<sub>2</sub>]<sup>+0</sup> reference couple. Samples were prepared by dissolving the analyte (5 – 10 mM) in a solution of supporting electrolyte (5 mM [<sup>n</sup>Bu<sub>4</sub>N][B(C<sub>6</sub>F<sub>5</sub>)<sub>4</sub>] in 1 ml THF). Studies of **1** showed five electrochemical events, of which four were stable over 5 cycles. The fifth event at -0.05 V *vs* FeCp<sub>2</sub><sup>+0</sup> diminished with successive scans. Studies of **2** showed two quasi-reversible waves (process 3 and 4) and one distorted wave, all of which were stable over a minimum of four cycles. Complex **3** exhibited three distorted waves, which were also stable over several cycles. Distortion of the waves prevented determination of  $E_{1/2}$  for some processes. All reported potentials are referenced to the FeCp<sub>2</sub><sup>+0</sup> redox couple, which was measured by addition of ferrocene (*ca.* 1 mg) to the solution after all initial voltammograms had been obtained.

| Compound | Process 1 $E_{1/2}$<br>/V | Process 2<br>$E_{1/2}$ /V | Process 3<br>$E_{1/2}$ /V | Process 4 $E_{1/2}$<br>/V | Process 5<br>$E_{1/2}$ /V |
|----------|---------------------------|---------------------------|---------------------------|---------------------------|---------------------------|
| <b>1</b> | -2.50                     | -1.88                     | -1.42                     | -0.62                     | -0.05                     |
| <b>2</b> |                           | -1.92 <sup>a</sup>        | -1.32                     | -0.81                     |                           |
| <b>3</b> |                           | -1.89 <sup>a</sup>        | -1.26 <sup>b</sup>        | -0.71 <sup>b</sup>        |                           |

Table S1 Electrode potentials *vs* FeCp<sub>2</sub><sup>+0</sup> in 0.05 M [<sup>n</sup>Bu<sub>4</sub>N][B(C<sub>6</sub>F<sub>5</sub>)<sub>4</sub>]/THF at 100 mV·s<sup>-1</sup>.

<sup>a</sup>Ep<sub>c</sub> values given instead of  $E_{1/2}$ ; <sup>b</sup>Ep<sub>a</sub> values given instead of  $E_{1/2}$ .

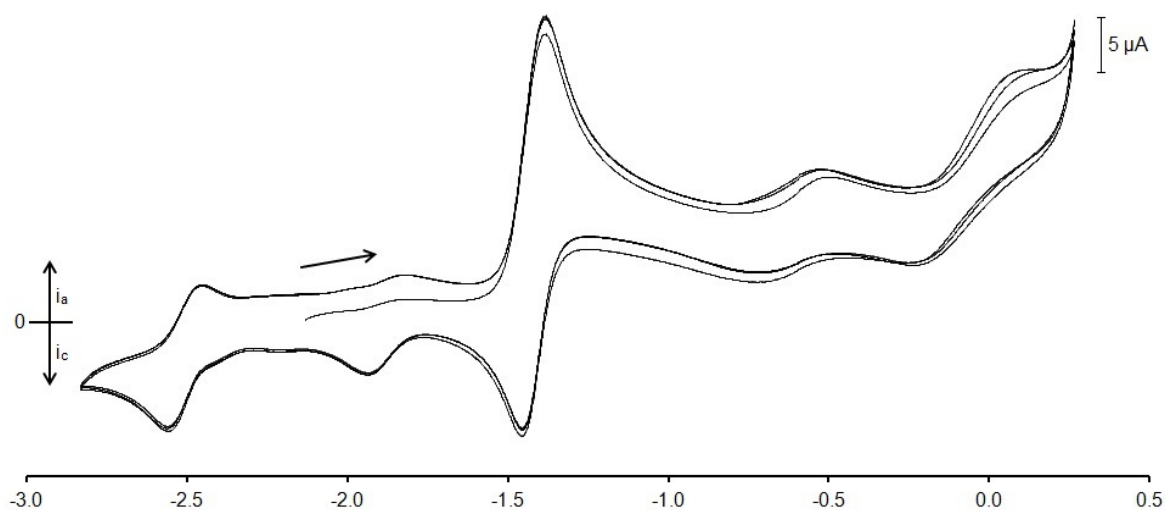

Figure S1: Overlaid CV scans (3 cycles) of  $[U(COT^{TIPS2})(Cp^{NMe4})]$  (1) in 0.05 M  $[nBu_4N][B(C_6F_5)_4]$ /THF at  $100 \text{ mV} \cdot \text{s}^{-1}$ .

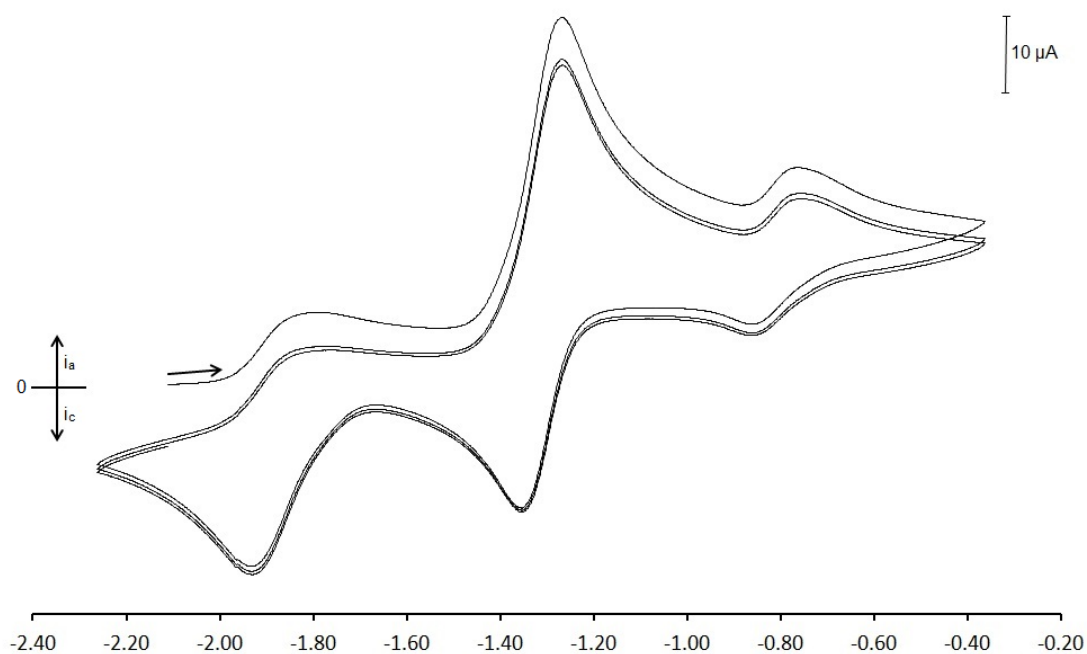

Figure S2: Overlaid CV scans (3 cycles) of  $[U(COT^{TIPS2})(Cp^{PMe4})]$  (2) in 0.05 M  $[nBu_4N][B(C_6F_5)_4]$ /THF at  $100 \text{ mV} \cdot \text{s}^{-1}$ .

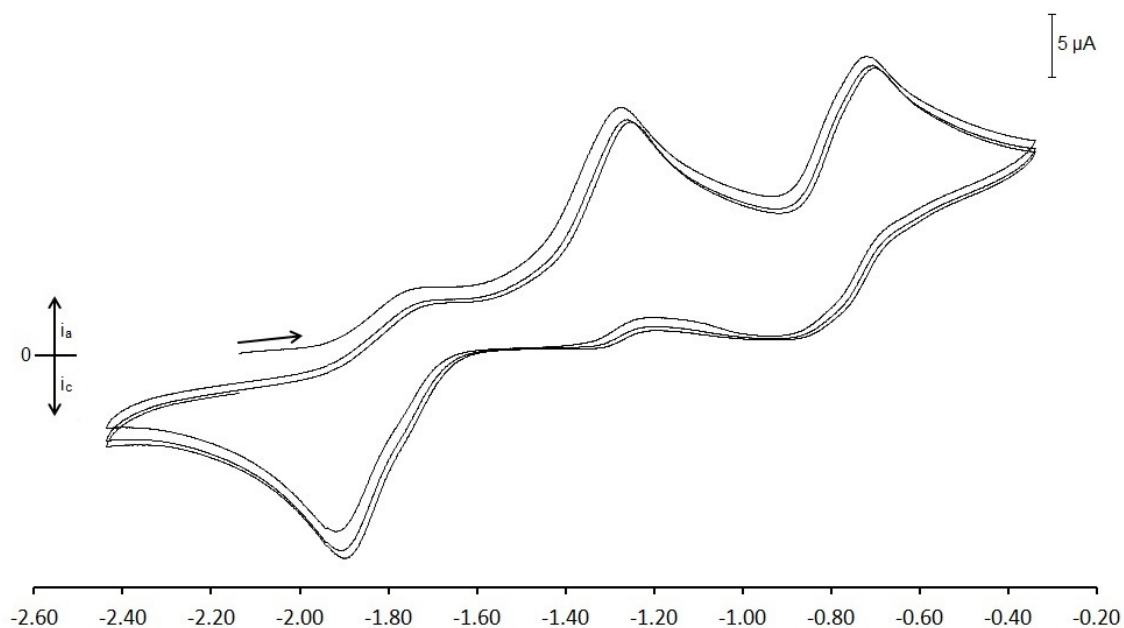

Figure S3: Overlaid CV scans (3 cycles) of  $[\text{U}(\text{COT}^{\text{TIPS}2})(\text{Cp}^{\text{AsMe}4})]$  (**3**) in 0.05 M  $[\text{nBu}_4\text{N}][\text{B}(\text{C}_6\text{F}_5)_4]/\text{THF}$  at  $100 \text{ mV} \cdot \text{s}^{-1}$ .

### X-ray Crystallographic Studies

Data for **1**, **2**, **3** and **5** were collected on a Enraf-Nonius CAD4 diffractometer with graphite-monochromated Mo K  $\alpha$  radiation ( $\lambda = 0.71073$ ) source, and data for **1**·THF were collected using a Agilent Technologies Xcalibur Gemini ultra diffractometer with a Cu K  $\alpha$  radiation ( $\lambda = 1.54184$ ) source at 173 K using an Oxford Cryosystems Cobra low temperature device, operating in  $\omega$  scanning mode with  $\psi$  and  $\omega$  scans to fill the Ewald sphere. The programs used for control and integration were Collect,<sup>1</sup> Scalepack and Denzo.<sup>2</sup> Absorption corrections were based on equivalent reflections using SADABS.<sup>3</sup> Data for **4** were collected and processed by the UK National Crystallography Service at the University of Southampton. The crystals were mounted on a glass fibre with silicon grease, from dried vacuum oil kept over 4 Å molecular sieves in an MBraun glovebox under Ar. All solutions and refinements were performed using the WinGX<sup>4</sup> or Olex2<sup>5</sup> packages and software therein. All non-hydrogen atoms were refined with anisotropic displacement parameters and all hydrogen atoms were refined using a riding model. Complex **1** could not be collected at high resolution, and the structure only illustrates connectivity. **2** and **3** exhibit disorder of the five-membered ring over two positions. This has been modelled in **2** to illustrate the two positions and has been modelled in **3** by keeping one of the ring carbon atoms isotropic. **4** crystallises with several molecules of hexane in the unit cell which has been modelled using the

SQUEEZE<sup>6</sup> function in PLATON.<sup>7</sup> Several atoms have been made isotropic due to positional disorder within the *iso*-propyl groups. Structural and refinement details are presented in the following tables.

| Compound                              | <b>1</b>                                                                       | <b>1·THF</b>                                        | <b>2·THF</b>                                        | <b>3·THF</b>                                        |
|---------------------------------------|--------------------------------------------------------------------------------|-----------------------------------------------------|-----------------------------------------------------|-----------------------------------------------------|
| Colour, Habit                         | Purple, Needle                                                                 | Brown, Needle                                       | Purple, Needle                                      | Brown Rod                                           |
| Size /mm                              | 0.10 x 0.12 x 0.18                                                             | 0.02 x 0.04 x 0.10                                  | 0.06 x 0.12 x 0.62                                  | 0.04 x 0.06 x 0.18                                  |
| Empirical Formula                     | C <sub>68</sub> H <sub>120</sub> N <sub>2</sub> Si <sub>4</sub> U <sub>2</sub> | C <sub>38</sub> H <sub>68</sub> NOSi <sub>2</sub> U | C <sub>38</sub> H <sub>68</sub> OPSi <sub>2</sub> U | C <sub>38</sub> H <sub>68</sub> OASi <sub>2</sub> U |
| M                                     | 1554.09                                                                        | 849.14                                              | 866.10                                              | 910.05                                              |
| Crystal System                        | Orthorhombic                                                                   | Monoclinic                                          | Monoclinic                                          | Monoclinic                                          |
| Space Group                           | Pbc21                                                                          | P21/n                                               | P21/n                                               | P21/n                                               |
| a /Å                                  | 12.5424(1)                                                                     | 11.8517(2)                                          | 11.8847(7)                                          | 11.9699(2)                                          |
| b /Å                                  | 22.7691(3)                                                                     | 14.9317(2)                                          | 14.9475(8)                                          | 14.9384(2)                                          |
| c /Å                                  | 24.9695(2)                                                                     | 22.2479(3)                                          | 22.5236(14)                                         | 22.3339(4)                                          |
| α /°                                  | 90                                                                             | 90                                                  | 90                                                  | 90                                                  |
| β /°                                  | 90                                                                             | 91.366(2)                                           | 89.568(5)                                           | 90.5380(10)                                         |
| γ /°                                  | 90                                                                             | 90                                                  | 90                                                  | 90                                                  |
| V /Å <sup>3</sup>                     | 7130.77(12)                                                                    | 3936.00(10)                                         | 4001.1(4)                                           | 3993.36(11)                                         |
| Z                                     | 8                                                                              | 4                                                   | 4                                                   | 4                                                   |
| μ /mm <sup>-1</sup>                   | 4.641                                                                          | 12.386                                              | 4.183                                               | 4.973                                               |
| T (K)                                 | 173.15                                                                         | 173.15                                              | 173.15                                              | 173.15                                              |
| θmin/max                              | 1.62, 27.48                                                                    | 3.565, 61.153                                       | 3.429, 29.374                                       | 1.64, 27.47                                         |
| Completeness                          | 0.999, 27.48                                                                   | 0.995                                               | 0.872, 29.374                                       | 0.999                                               |
| Reflections Total/Independent         | 96143 / 15976                                                                  | 21216 / 6020                                        | 34897 / 9625                                        | 53555 / 9140                                        |
| Rint                                  | 0.0649                                                                         | 0.0504                                              | 0.0460                                              | 0.0843                                              |
| Final R1 and wR2                      | 0.0333, 0.0765                                                                 | 0.0539, 0.1539                                      | 0.0291, 0.0613                                      | 0.0396, 0.1146                                      |
| Largest peak hole/ e. Å <sup>-3</sup> | 0.873 / -1.900                                                                 | 6.613 / -2.035                                      | 1.03/-0.97                                          | 1.297 / -2.231                                      |
| ρcalc/g.cm <sup>-3</sup>              | 1.448                                                                          | 1.433                                               | 1.438                                               | 1.514                                               |

| Compound                                 | <b>4</b>                                                                                      | <b>5</b>                                                                                      |
|------------------------------------------|-----------------------------------------------------------------------------------------------|-----------------------------------------------------------------------------------------------|
| Colour, Habit                            | Orange, Plate                                                                                 | Red Prism                                                                                     |
| Size /mm                                 | 0.01 x 0.06 x 0.07                                                                            | 0.06 x 0.08 x 0.12                                                                            |
| Empirical Formula                        | C <sub>70</sub> H <sub>120</sub> N <sub>2</sub> O <sub>5</sub> Si <sub>4</sub> U <sub>2</sub> | C <sub>70</sub> H <sub>120</sub> O <sub>5</sub> Si <sub>4</sub> P <sub>2</sub> U <sub>2</sub> |
| M                                        | 1658.11                                                                                       | 1692.03                                                                                       |
| Crystal System                           | Triclinic                                                                                     | Monoclinic                                                                                    |
| Space Group                              | P-1                                                                                           | P21/c                                                                                         |
| a /Å                                     | 12.9610(9)                                                                                    | 22.3131(4)                                                                                    |
| b /Å                                     | 14.6337(10)                                                                                   | 15.0442(3)                                                                                    |
| c /Å                                     | 22.2106(16)                                                                                   | 22.7699(4)                                                                                    |
| $\alpha$ /°                              | 97.035(6)                                                                                     | 90                                                                                            |
| $\beta$ /°                               | 97.053(6)                                                                                     | 96.826(1)                                                                                     |
| $\gamma$ /°                              | 102.983(7)                                                                                    | 90                                                                                            |
| V /Å <sup>3</sup>                        | 4024.5(5)                                                                                     | 7589.3(2)                                                                                     |
| Z                                        | 2                                                                                             | 4                                                                                             |
| $\mu$ /mm <sup>-1</sup>                  | 4.121                                                                                         | 4.412                                                                                         |
| T (K)                                    | 173.15                                                                                        | 173.15                                                                                        |
| $\theta$ min/max                         | 2.430, 27.562                                                                                 | 3.439, 27.492                                                                                 |
| Completeness                             | 97.7, 27.562                                                                                  | 0.988                                                                                         |
| Reflections<br>Total/Independent         | 47825 / 18150                                                                                 | 53555 / 9140                                                                                  |
| Rint                                     | 0.0794                                                                                        | 0.0843                                                                                        |
| Final R1 and wR2                         | 0.0703, 0.1751                                                                                | 0.0550, 0.1586                                                                                |
| Largest peak<br>hole/ e. Å <sup>-3</sup> | 4.02/-2.64                                                                                    | 1.159 / -8.442                                                                                |
| $\rho$ calc/g.cm <sup>-3</sup>           | 1.368                                                                                         | 1.514                                                                                         |

CCDC 1051779-1051784 contain the supplementary crystallographic data for this paper.

<sup>1</sup> Collect, Bruker-AXS, Madison, WI, 1997–2004.

<sup>2</sup> Z. Otwinowski, W. Minor and W. SCALEPACK and DENZO, *Methods Enzymol.*, 1997, **276**, 307.

- 
- <sup>3</sup> G. M. Sheldrick, *SADABS V2008/1*, University of Göttingen, Göttingen, Germany.
- <sup>4</sup> O. V. Dolomanov, L. J. Bourhis, R. J. Gildea, J. A. K. Howard and H. Puschmann, *J. Appl. Crystallogr.*, 2009, **42**, 339–341.
- <sup>5</sup> L. J. Farrugia, *J. Appl. Crystallogr.*, 1999, **32**, 837–838.
- <sup>6</sup> P. Van Der Sluis and A. L. Spek, *Acta Crystallogr., A, Found. Crystallogr.*, 1990, **46**, 194–201.
- <sup>7</sup> A. L. Spek, *J. Appl. Crystallogr.*, 2003, **36**, 7–13.
